# Supplementary material
Source: PubMed Central journal article supplement (PMC3274356)
Supplement: supp_139.5.948_DEV067579TableS1.pdf [file supp_139.5.948_DEV067579TableS1.pdf]

**Table S1. Primers**

| <b>Primer name</b>      | <b>Sequence (5'-3')</b>        | <b>Description</b>                                                                       |
|-------------------------|--------------------------------|------------------------------------------------------------------------------------------|
| F-SHP2-CK(N308D)        | AGGAGTGCAAACCTTCTCTACAGCC      | Site-directed mutagenesis of SHP-2 <sup>FL</sup> to make SHP-2 <sup>N308D</sup> .        |
| R-SHP2-CK(N308D)        | GGCTGTAGAGAAGTTTGCACCTCCT      | As above                                                                                 |
| F-SHP2 PTP mutagenesis  | GTCGTGGTGCACGGCAGTGCTGGAATTGGC | Site-directed mutagenesis of SHP-2 <sup>N308D</sup> to make SHP-2 <sup>N308D-PTP</sup> . |
| R- SHP2 PTP mutagenesis | GCCAATTCCAGCACTGCCGTGCACCACGAC | As above                                                                                 |
